# Supplementary material for: Genetic Diversity of Aspergillus flavus on Maize in Guatemala
Source: MDPI journal article supplement (doi:10.3390/foods12203864), 2023-10-21
Supplement: s1 [file s1]

## ANOVA for Complete Dataset (272 isolates)

### **Na**

| Source | Nparm | DF | Sum of Squares | F Ratio | Prob > F |
|--------|-------|----|----------------|---------|----------|
| Pop    | 3     | 3  | 24.54688       | 8.4251  | 0.0001*  |
| Locus  | 15    | 15 | 291.23438      | 19.9918 | <.0001*  |

| Level |   |   | Least Sq Mean |
|-------|---|---|---------------|
| Med   | A |   | 4.8750000     |
| Low   | A |   | 4.6250000     |
| Zero  | A |   | 4.1875000     |
| High  |   | B | 3.2500000     |

### **Ne**

| Source | Nparm | DF | Sum of Squares | F Ratio | Prob > F |
|--------|-------|----|----------------|---------|----------|
| Pop    | 3     | 3  | 1.492854       | 1.4318  | 0.2460   |
| Locus  | 15    | 15 | 80.197797      | 15.3833 | <.0001*  |

### **I**

| Source | Nparm | DF | Sum of Squares | F Ratio | Prob > F |
|--------|-------|----|----------------|---------|----------|
| Pop    | 3     | 3  | 0.125002       | 1.2317  | 0.3093   |
| Locus  | 15    | 15 | 19.094946      | 37.6313 | <.0001*  |

### **h**

| Source | Nparm | DF | Sum of Squares | F Ratio | Prob > F |
|--------|-------|----|----------------|---------|----------|
| Pop    | 3     | 3  | 0.0139322      | 0.5885  | 0.6257   |
| Locus  | 15    | 15 | 4.5008414      | 38.0245 | <.0001*  |

### **uh**

| Source | Nparm | DF | Sum of Squares | F Ratio | Prob > F |
|--------|-------|----|----------------|---------|----------|
| Pop    | 3     | 3  | 0.0129105      | 0.5230  | 0.6687   |
| Locus  | 15    | 15 | 4.6671664      | 37.8124 | <.0001*  |

## ANOVA for Clones (126 clones)

Na

| Source | Nparm | DF | Sum of Squares | F Ratio | Prob > F |
|--------|-------|----|----------------|---------|----------|
| Pop    | 3     | 3  | 115.54687      | 37.5127 | <.0001*  |
| Locus  | 15    | 15 | 286.85938      | 18.6260 | <.0001*  |

| Level |   |   | Least Sq Mean |
|-------|---|---|---------------|
| Zero  | A |   | 5.6875000     |
| Med   | A |   | 5.1250000     |
| Low   |   | B | 2.8125000     |
| High  |   | B | 2.6875000     |

Ne

| Source | Nparm | DF | Sum of Squares | F Ratio | Prob > F |
|--------|-------|----|----------------|---------|----------|
| Pop    | 3     | 3  | 5.90032        | 6.6909  | 0.0008*  |
| Locus  | 15    | 15 | 143.48701      | 32.5425 | <.0001*  |

| Level |   |   | Least Sq Mean |
|-------|---|---|---------------|
| Zero  | A |   | 2.7504375     |
| Med   | A | B | 2.5230625     |
| Low   |   | B | 2.0515625     |
| High  |   | B | 2.0507500     |

I

| Source | Nparm | DF | Sum of Squares | F Ratio | Prob > F |
|--------|-------|----|----------------|---------|----------|
| Pop    | 3     | 3  | 2.550534       | 35.8519 | <.0001*  |
| Locus  | 15    | 15 | 23.536040      | 66.1675 | <.0001*  |

| Level |   |   |   | Least Sq Mean |
|-------|---|---|---|---------------|
| Zero  | A |   |   | 1.0783125     |
| Med   |   | B |   | 0.8944375     |
| Low   |   |   | C | 0.6121250     |
| High  |   |   | C | 0.6056875     |

**h**

| Source | Nparm | DF | Sum of Squares | F Ratio | Prob > F |
|--------|-------|----|----------------|---------|----------|
| Pop    | 3     | 3  | 0.3619972      | 23.3194 | <.0001*  |
| Locus  | 15    | 15 | 5.2708684      | 67.9085 | <.0001*  |

| Level |   |   |   | Least Sq Mean |
|-------|---|---|---|---------------|
| Zero  | A |   |   | 0.50500000    |
| Med   |   | B |   | 0.41887500    |
| Low   |   |   | C | 0.32518750    |
| High  |   |   | C | 0.32362500    |

**uh**

| Source | Nparm | DF | Sum of Squares | F Ratio | Prob > F |
|--------|-------|----|----------------|---------|----------|
| Pop    | 3     | 3  | 0.3424110      | 19.0216 | <.0001*  |
| Locus  | 15    | 15 | 5.7205202      | 63.5571 | <.0001*  |

| Level |   |   |   | Least Sq Mean |
|-------|---|---|---|---------------|
| Zero  | A |   |   | 0.51862500    |
| Med   |   | B |   | 0.42862500    |
| Low   |   |   | C | 0.34256250    |
| High  |   |   | C | 0.34125000    |
